# Supplementary material
Source: Springer Nature journal article supplement (https://www.springermedizin.de/resource/supplementary/13023_2013_692_MOESM13_ESM.pdf/9642682)

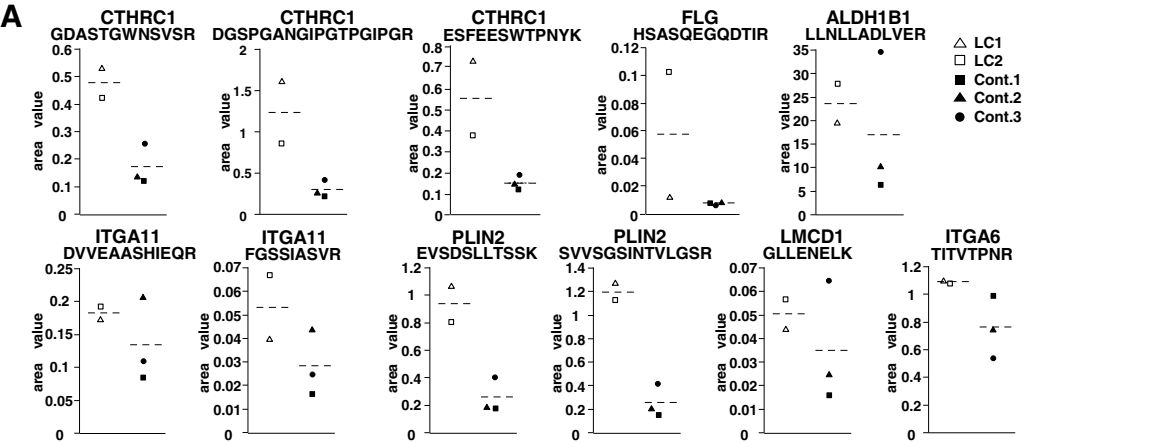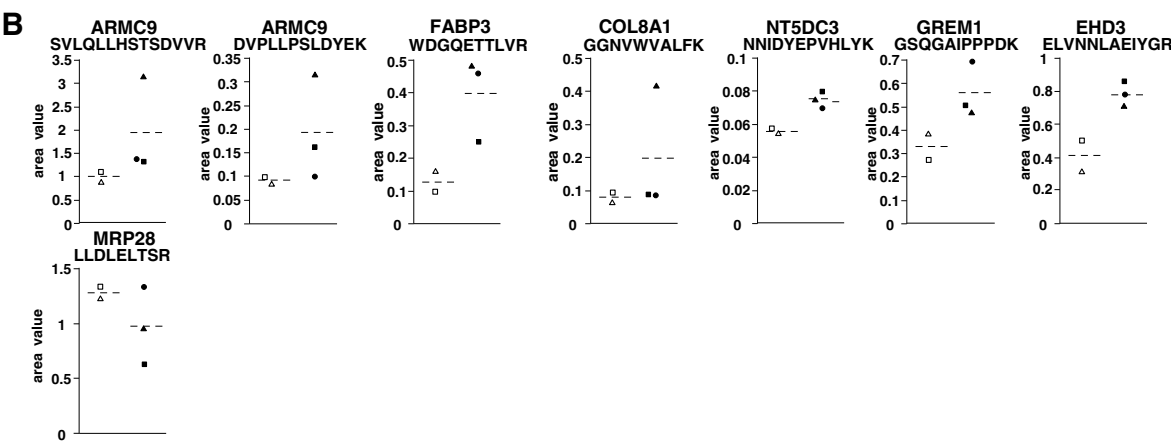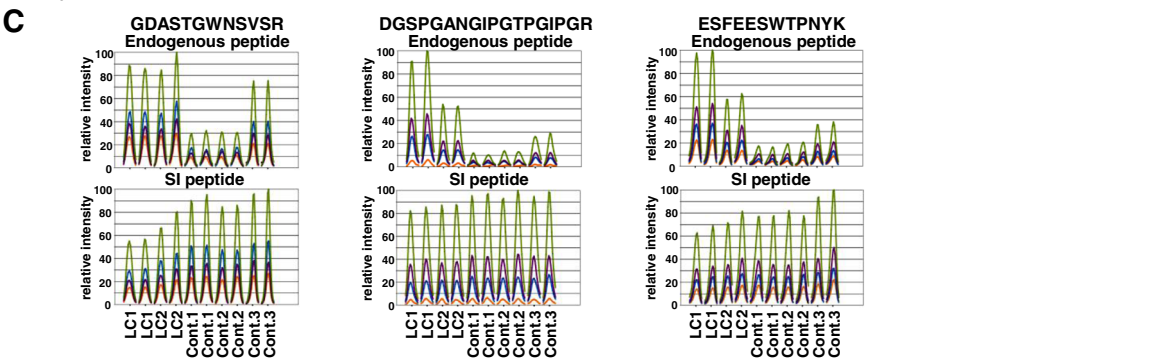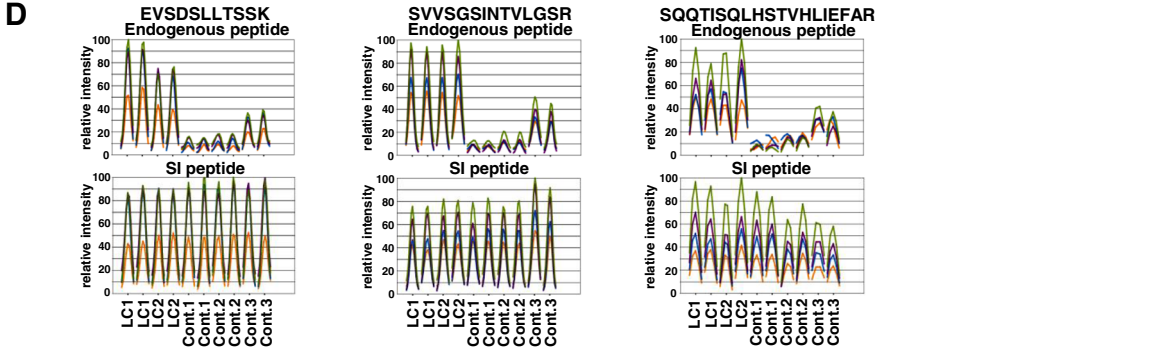

Supplement: MOESM13 [file 9642682]
